# Supplementary material for: Increased serum levels of circulating exosomal microRNA-373 in receptor-negative breast cancer patients
Source: PubMed Central journal article supplement (PMC4259427; doi:10.18632/oncotarget.2520), 2014-10-11
Supplement: oncotarget-05-9650-s001.pdf [file oncotarget-05-9650-s001.pdf]

## SUPPLEMENTARY FIGURES AND TABLES

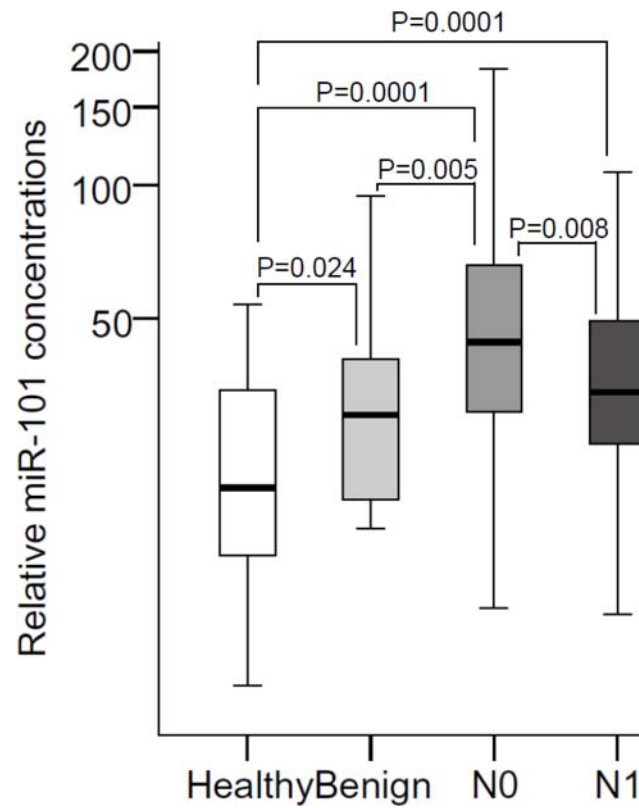

**Supplementary Figure S1: Decreased serum levels of cell-free miR-101 are associated with lymph node metastasis.** The box plot compares the serum concentrations of miR-101 in lymph node-negative (n=114) with those in lymph node-positive patients (n=53). As determined by the Mann-Whitney-U test, the significant p-values of the statistical evaluations are indicated.

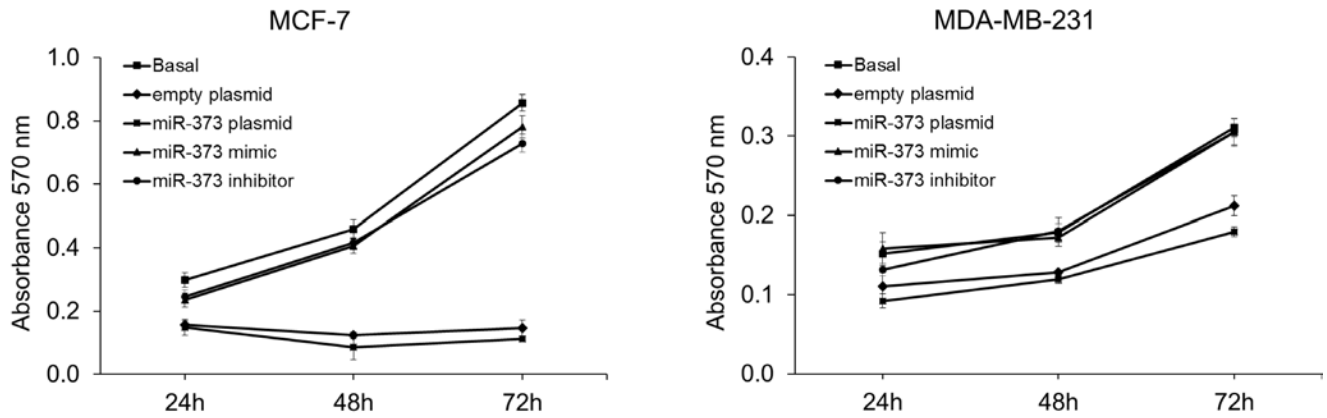

**Supplementary Figure S2: miR-373 does not affect cell proliferation.** MCF-7 and MDA-MB-231 cells were transiently transfected with empty expression plasmid or plasmid encoding for miR-373, with mimics or inhibitors of miR-373, and treated with MTT. Cell proliferation after overexpression and inhibition of miR-373 for 24, 48 and 72 hours. The standard deviations from triplicate experiments are indicated.

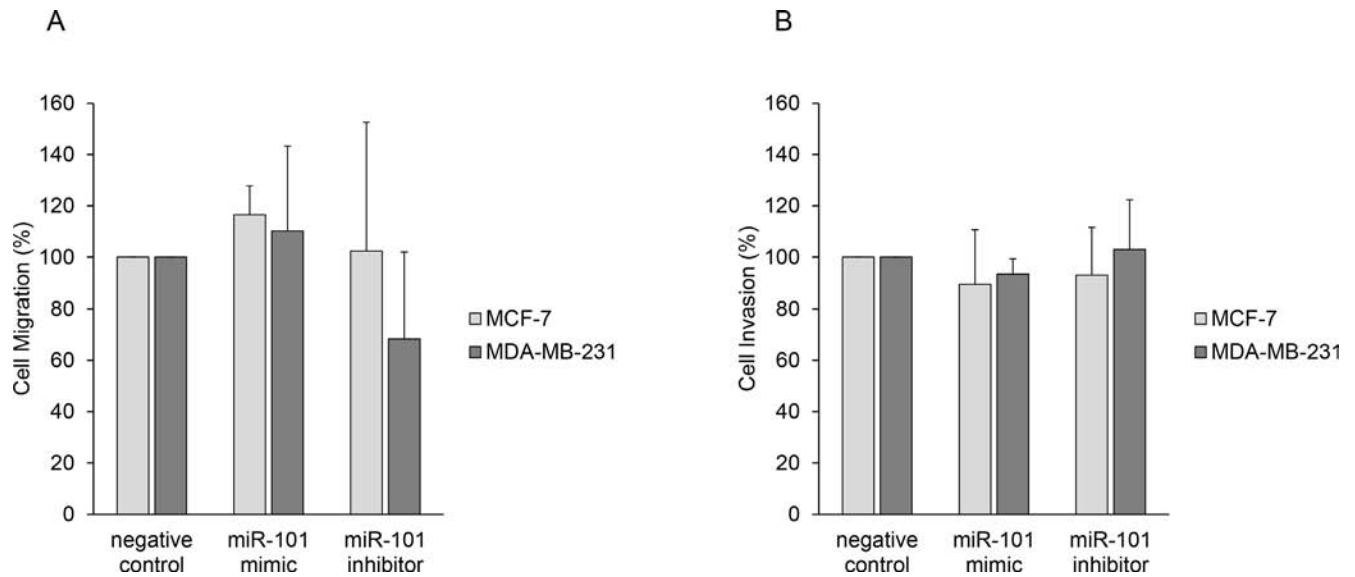

**Supplementary Figure S3: miR-101 does not affect cell migration and invasion of breast cancer cells.** Cell migration and invasion of MCF-7 and MDA-MB-231 cells were analyzed by transwell assays. Cells were transfected with mimics or inhibitors of miR-101 prior to serum starvation for 24 hours. Cells were added to the upper transwell chamber that was uncoated for the migration assay and BME-coated for the invasion assay, and allowed to migrate or invade for 24 hours. Migrated or invaded cells were stained with Calcein-AM, and fluorescence was measured at excitation of 485nm and emission of 535nm.

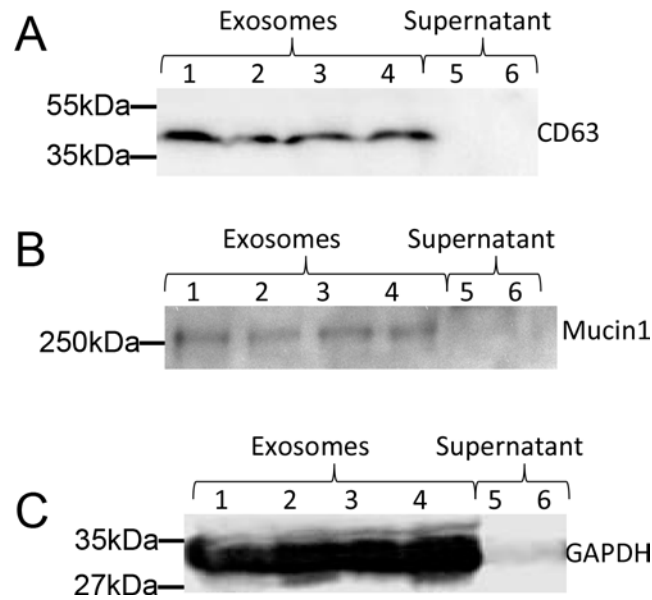

**Supplementary Figure S4: Extraction of serum exosomes.** Exosomes were extracted and pelleted from serum and analyzed by Western blot using an antibody specific for the proteins (A) CD63, (B) Mucin1 and (C) GAPDH. As a negative control served the supernatant of the pellet that displayed no exosomes when the antibodies against CD63, Mucin1 and GAPDH were added. The Western blot shows representative examples of the exosome extraction from pellets of four breast cancer patients (lane 1, 2, 3, 4) and the negative control of two patients (lane 5, 6).

**Supplementary Table S1. Patient characteristics at the time of primary diagnosis of breast cancer and correlation to the relative miR concentrations in serum.**

| Parameters                   | n (%)      | miR-101         |      | miR-372  |                 | miR-373 |          |                 |      |       |
|------------------------------|------------|-----------------|------|----------|-----------------|---------|----------|-----------------|------|-------|
|                              |            | relative values |      | p values | relative values |         | p values | relative values |      |       |
|                              |            | Median          | Mean |          | Median          | Mean    |          | Median          | Mean |       |
|                              |            | 5%              | 95%  |          | 5%              | 95%     |          | 5%              | 95%  |       |
| <b>Total</b>                 |            | CI              |      |          | CI              |         |          | CI              |      |       |
|                              | 168 (100)  | 42              | 49   |          | 0.2             | 0.6     |          | 3.8             | 8.4  |       |
|                              |            | 16              | 106  |          | 0               | 2.6     |          | 0.4             | 43   |       |
| <b>Age</b>                   |            | 45 - 54         |      |          | 0.4 - 0.8       |         |          | 5.3 - 10.6      |      |       |
| <b>Histology</b>             | 59 (30-85) |                 |      |          |                 |         |          |                 |      |       |
| <b>ductal</b>                |            |                 |      | 0.464    |                 |         | 0.613    |                 |      | 0.934 |
|                              | 109 (65)   | 41              | 51   |          | 0.2             | 0.7     |          | 3.8             | 8.4  |       |
|                              |            | 17              | 118  |          | 0               | 3.1     |          | 0.4             | 40   |       |
| <b>ductu-lobular</b>         |            | 45 - 58         |      |          | 0.4 - 0.9       |         |          | 6.0 - 11        |      |       |
|                              | 9 (5)      | 48              | 47   |          | 0.2             | 0.3     |          | 2.2             | 8    |       |
|                              |            | 29              | -    |          | 0               | -       |          | 0.7             | -    |       |
| <b>lobular</b>               |            | 36 - 58         |      |          | 0.1 - 0.6       |         |          | 0 - 20          |      |       |
|                              | 31 (19)    | 41              | 43   |          | 0.2             | 0.4     |          | 4.3             | 10   |       |
|                              |            | 12              | 93   |          | 0               | 1.8     |          | 0.2             | 73   |       |
| <b>others</b>                |            | 35 - 50         |      |          | 0.2 - 0.5       |         |          | 3.6 - 17        |      |       |
|                              | 19 (11)    | 43              | 48   |          | 0               | 0.4     |          | 3.2             | 5.5  |       |
|                              |            | 15              | -    |          | 0               | -       |          | 0.3             | -    |       |
| <b>Lymph node metastasis</b> |            | 37 - 59         |      |          | 0.0 - 1.0       |         |          | 1.1 - 9.8       |      |       |
| <b>neg.</b>                  |            |                 |      | 0.008    |                 |         | 0.975    |                 |      | 0.418 |
|                              | 114 (68)   | 44              | 52   |          | 0.2             | 0.6     |          | 4.2             | 9.5  |       |
|                              |            | 18              | 106  |          | 0               | 3.1     |          | 0.4             | 49   |       |
| <b>pos.</b>                  |            | 46 - 57         |      |          | 0.4 - 0.9       |         |          | 6.7 - 12        |      |       |
|                              | 53 (32)    | 35              | 41   |          | 0.2             | 0.4     |          | 3.3             | 6.1  |       |
|                              |            | 13              | 87   |          | 0               | 2.4     |          | 0.4             | 23   |       |
| <b>Tumor stage</b>           |            | 35 - 48         |      |          | 0.2 - 0.7       |         |          | 3.4 - 8.8       |      |       |
| <b>pT1</b>                   |            |                 |      | 0.397    |                 |         | 0.659    |                 |      | 0.106 |
|                              | 93 (56)    | 43              | 50   |          | 0.2             | 0.6     |          | 2.8             | 8.0  |       |
|                              |            | 16              | 106  |          | 0               | 2.6     |          | 0.4             | 49   |       |
| <b>pT2- 4</b>                |            | 44 - 56         |      |          | 0.3 - 0.8       |         |          | 5.2 - 11        |      |       |

(Continued)

| Parameters                          | n (%)    | miR-101         |          | miR-372         |           | miR-373         |          |            |      |       |
|-------------------------------------|----------|-----------------|----------|-----------------|-----------|-----------------|----------|------------|------|-------|
|                                     |          | relative values | p values | relative values | p values  | relative values | p values |            |      |       |
|                                     |          | Median          | Mean     |                 | Median    | Mean            |          | Median     | Mean |       |
|                                     | 74 (44)  | 39              | 47       |                 | 0.2       | 0.6             |          | 4.3        | 9.1  |       |
|                                     |          | 16              | 110      |                 | 0         | 3               |          | 0.5        | 37   |       |
| <b>Grading</b>                      |          | 41 - 54         |          |                 | 0.3 - 0.9 |                 |          | 5.7 - 12.4 |      |       |
| <b>1.2</b>                          |          |                 |          | 0.624           |           |                 | 0.525    |            |      | 0.625 |
|                                     | 98 (60)  | 42              | 47       |                 | 0.3       | 0.6             |          | 3.6        | 8.7  |       |
|                                     |          | 15              | 100      |                 | 0         | 2.9             |          | 0.3        | 49   |       |
| <b>3</b>                            |          | 42 - 53         |          |                 | 0.4 - 0.9 |                 |          | 5.8 - 12   |      |       |
|                                     | 64 (40)  | 40              | 46       |                 | 0.2       | 0.6             |          | 4.1        | 8.5  |       |
|                                     |          | 16              | 106      |                 | 0         | 3.3             |          | 0.7        | 43   |       |
| <b>Estrogen receptor status</b>     |          | 40 - 53         |          |                 | 0.3 - 0.8 |                 |          | 5.2 - 12   |      |       |
| <b>neg.</b>                         |          |                 |          | 0.596           |           |                 | 0.484    |            |      | 0.735 |
|                                     | 38 (23)  | 42              | 50       |                 | 0.2       | 0.5             |          | 4.1        | 7.4  |       |
|                                     |          | 18              | 123      |                 | 0         | 3.3             |          | 0.7        | 31   |       |
| <b>pos.</b>                         |          | 41 - 60         |          |                 | 0.2 - 0.9 |                 |          | 3.6 - 11   |      |       |
|                                     | 127 (77) | 41              | 48       |                 | 0.2       | 0.6             |          | 3.4        | 8.9  |       |
|                                     |          | 14              | 102      |                 | 0         | 2.9             |          | 0.3        | 48   |       |
| <b>Progesterone receptor status</b> |          | 43 - 53         |          |                 | 0.4 - 0.8 |                 |          | 6.3 - 11   |      |       |
| <b>neg.</b>                         |          |                 |          | 0.672           |           |                 | 0.479    |            |      | 0.095 |
|                                     | 68 (41)  | 38              | 50       |                 | 0.3       | 0.7             |          | 4.2        | 8.3  |       |
|                                     |          | 19              | 127      |                 | 0         | 3.4             |          | 0.8        | 32   |       |
| <b>pos.</b>                         |          | 42 - 59         |          |                 | 0.4       |                 |          | 5.4 - 11   |      |       |
|                                     | 98 (59)  | 44              | 48       |                 | 0.2       | 0.5             |          | 2.7        | 8.6  |       |
|                                     |          | 14              | 100      |                 | 0         | 1.9             |          | 0.4        | 49   |       |
| <b>HER2 status</b>                  |          | 43 - 53         |          |                 | 0.3 - 0.7 |                 |          | 5.6 - 12   |      |       |
| <b>neg.</b>                         |          |                 |          | 0.829           |           |                 | 0.644    |            |      | 0.548 |
|                                     | 129 (82) | 43              | 49       |                 | 0.2       | 0.6             |          | 3.6        | 7.7  |       |
|                                     |          | 15              | 106      |                 | 0         | 3.2             |          | 0.4        | 43   |       |
| <b>pos.</b>                         |          | 43 - 55         |          |                 | 0.4 - 0.8 |                 |          | 5.5 - 10   |      |       |
|                                     | 28 (18)  | 40              | 40       |                 | 0.2       | 0.4             |          | 3.8        | 5.4  |       |
|                                     |          | 16              | 117      |                 | 0         | 2.4             |          | 0.3        | 15   |       |
| <b>Subtyp</b>                       |          | 32 - 49         |          |                 | 0.1 - 0.7 |                 |          | 3.4 - 7.4  |      |       |
| <b>Luminal</b>                      |          |                 |          | 0.630           |           |                 | 0.362    |            |      | 0.445 |
|                                     | 119 (76) | 41              | 47       |                 | 0.2       | 0.6             |          | 3          | 7.9  |       |

(Continued)

| Parameters                   | n (%)    | miR-101         |          | miR-372         |           | miR-373         |          |            |      |              |
|------------------------------|----------|-----------------|----------|-----------------|-----------|-----------------|----------|------------|------|--------------|
|                              |          | relative values | p values | relative values | p values  | relative values | p values |            |      |              |
|                              |          | Median          | Mean     |                 | Median    | Mean            |          | Median     | Mean |              |
|                              |          | 14              | 103      |                 | 0         | 3.1             |          | 0.3        | 41   |              |
| <b>HER2 pos.</b>             |          | 41 - 53         |          |                 | 0.4 - 0.8 |                 |          | 5.5 - 10   |      |              |
|                              | 5 (3)    | 42              | 33       |                 | 0.1       | 0.7             |          | 4.2        | 6.7  |              |
|                              |          | 15              | -        |                 | 0         | -               |          | 1.2        | -    |              |
| <b>Triple neg.</b>           |          | 6.2 - 60        |          |                 | 0 - 2.7   |                 |          | 0 - 19     |      |              |
|                              | 33 (21)  | 43              | 53       |                 | 0.2       | 0.5             |          | 4.4        | 8.4  |              |
|                              |          | 21              | 142      |                 | 0         | 3               |          | 0.8        | 40   |              |
| <b>Overall survival</b>      |          | 39 - 66         |          |                 | 0.1 - 0.8 |                 |          | 3.6 - 13   |      |              |
| <b>alive</b>                 |          |                 |          | 0.691           |           |                 | 0.586    |            |      | 0.361        |
|                              | 147 (90) | 43              | 49       |                 | 0.2       | 0.6             |          | 3.6        | 8.8  |              |
|                              |          | 16              | 104      |                 | 0         | 3               |          | 0.4        | 48   |              |
| <b>dead</b>                  |          | 44 - 54         |          |                 | 0.4 - 0.8 |                 |          | 6.4 - 11.1 |      |              |
|                              | 16 (10)  | 40              | 46       |                 | 0.3       | 0.3             |          | 3.8        | 4.1  |              |
|                              |          | 5.7             | -        |                 | 0         | -               |          | 0.6        | -    |              |
| <b>Disease-free survival</b> |          | 30 - 62         |          |                 | 0.1 - 0.4 |                 |          | 2.5 - 5.7  |      |              |
| <b>Recurrence-free</b>       |          |                 |          | *               |           |                 | 0.318    |            |      | *            |
|                              | 147 (90) | 43              | 51       |                 | 0.2       | 0.6             |          | 4.2        | 8.9  |              |
|                              |          | 17              | 110      |                 | 0         | 3               |          | 0.5        | 48   |              |
| <b>Recurrence</b>            |          | 46 - 56         |          |                 | 0.4 - 0.8 |                 |          | 6.5 - 11.3 |      |              |
|                              | 16 (10)  | 35              | 39       |                 | 0.2       | 0.3             |          | 2.9        | 3.3  |              |
|                              |          | 10              | -        |                 | 0         | -               |          | 0          | -    |              |
|                              |          | 29 - 49         |          |                 | 0.1 - 0.6 |                 |          | 1.7 - 4.9  |      |              |
| <b>Healthy</b>               |          |                 |          |                 |           |                 |          |            |      |              |
|                              | 28 (100) | 20              | 24       | <b>0.0001</b>   | 0.1       | 0.3             | 0.509    | 1.5        | 2.3  | <b>0.001</b> |
|                              |          | 7.9             | 51       |                 | 0         | -               |          | 0.1        | 6.5  |              |
| <b>Benign</b>                |          | 19 - 28         |          |                 | 0 - 0.6   |                 |          | 1.5 - 3.1  |      |              |
|                              | 19 (100) | 30              | 35       | <b>0.013</b>    | 0.3       | 0.4             | 0.495    | 7.8        | 9.6  | <b>0.024</b> |
|                              |          | 16              | -        |                 | 0         | -               |          | 0.3        | -    |              |
|                              |          | 25 - 45         |          |                 | 0.1 - 0.7 |                 |          | 6.1 - 13.0 |      |              |

\*no statistical evaluation possible

significant p values in bold

**Supplementary Table S2. Patient characteristics at the time of primary diagnosis of breast cancer and correlation to the relative miR concentrations in exosomes.**

| Parameters                   | n (%)      | miR-101         |      | p values | miR-372         |      | p values | miR-373         |      | p values |
|------------------------------|------------|-----------------|------|----------|-----------------|------|----------|-----------------|------|----------|
|                              |            | relative values |      |          | relative values |      |          | relative values |      |          |
|                              |            | Median          | Mean |          | Median          | Mean |          | Median          | Mean |          |
|                              |            | 5%              | 95%  |          | 5%              | 95%  |          | 5%              | 95%  |          |
|                              |            | CI              |      |          | CI              |      |          | CI              |      |          |
| <b>Total</b>                 | 50 (100)   | 101             | 118  |          | 1.1             | 1.6  |          | 16              | 29   |          |
|                              | 38         | 271             |      | 0        | 4.7             |      | 1.5      | 104             |      |          |
|                              |            | 99 - 137        |      |          | 1.2 - 2.0       |      |          | 20 - 38         |      |          |
| <b>Age</b>                   | 56 (30-83) |                 |      |          |                 |      |          |                 |      |          |
| <b>Histology</b>             |            |                 |      | 0.759    |                 |      | 0.883    |                 |      | 0.217    |
| <b>ductal</b>                | 38 (76)    | 102             | 120  |          | 1.3             | 1.6  |          | 13              | 26   |          |
|                              |            | 32              | 295  |          | 0               | 4.4  |          | 1.2             | 88   |          |
|                              |            | 97 - 142        |      |          | 1.1 - 2.1       |      |          | 16 - 36         |      |          |
| <b>ductu-lobular</b>         | 2 (4)      | 81              | 81   |          | 1.0             | 1.0  |          | 33              | 33   |          |
|                              |            | 64              | -    |          | 0               | -    |          | 13              | -    |          |
|                              |            | 0 - 286         |      |          | 0 - 13          |      |          | 0 - 283         |      |          |
| <b>lobular</b>               | 7 (11)     | 129             | 119  |          | 0.8             | 2.0  |          | 35              | 62   |          |
|                              |            | 63              | -    |          | 0.7             | -    |          | 14              | -    |          |
|                              |            | 66 - 172        |      |          | 0 - 4.9         |      |          | 1.7 - 122       |      |          |
| <b>others</b>                | 3 (6)      | 73              | 71   |          | 0.9             | 0.9  |          | 13              | 56   |          |
|                              |            | 69              | -    |          | 0.8             | -    |          | 7.0             | -    |          |
|                              |            | 44 - 98         |      |          | 0 - 2.3         |      |          | 0 - 677         |      |          |
| <b>Lymph node metastasis</b> |            |                 |      | 0.212    |                 |      | 1.000    |                 |      | 0.276    |
| <b>neg.</b>                  | 35 (71)    | 118             | 130  |          | 1.2             | 1.5  |          | 14              | 22   |          |
|                              |            | 29              | 297  |          | 0               | 5.4  |          | 1.2             | 112  |          |
|                              |            | 100 - 160       |      |          | 0.9 - 2.1       |      |          | 11 - 32         |      |          |
| <b>pos.</b>                  | 14 (29)    | 90              | 90   |          | 1.2             | 1.3  |          | 29              | 37   |          |
|                              |            | 63              | -    |          | 0               | -    |          | 1.6             | -    |          |
|                              |            | 79 - 101        |      |          | 0.8 - 1.9       |      |          | 16 - 59         |      |          |
| <b>Tumor stage</b>           |            |                 |      | 0.435    |                 |      | 0.174    |                 |      | 0.271    |
| <b>pT1</b>                   | 25 (50)    | 112             | 113  |          | 1.0             | 1.2  |          | 13              | 20   |          |
|                              |            | 21              | 289  |          | 0               | 4.3  |          | 1.4             | 92   |          |
|                              |            | 95 - 132        |      |          | 0.6 - 1.9       |      |          | 10 - 30         |      |          |
| <b>pT2- 4</b>                | 25 (50)    | 83              | 119  |          | 1.6             | 1.6  |          | 17              | 35   |          |
|                              |            | 40              | 280  |          | 0               | -    |          | 1.1             | 132  |          |

(Continued)



| Parameters                          | n (%)   | miR-101         |                 | p values | miR-372         |                 | p values | miR-373  |      | p values     |
|-------------------------------------|---------|-----------------|-----------------|----------|-----------------|-----------------|----------|----------|------|--------------|
|                                     |         | relative values | relative values |          | relative values | relative values |          |          |      |              |
|                                     |         | Median          | Mean            |          | Median          | Mean            |          | Median   | Mean |              |
|                                     |         | 78 - 160        |                 |          | 1.1 - 2.2       |                 |          | 17 - 53  |      |              |
| <b>Grading</b>                      |         |                 |                 | 0.377    |                 |                 | 0.636    |          |      | 0.133        |
| <b>1.2</b>                          | 27 (61) | 97              | 112             |          | 1.2             | 1.5             |          | 14       | 22   |              |
|                                     |         | 21              | 240             |          | 0               | 5.8             |          | 1.0      | 122  |              |
|                                     |         | 85 - 138        |                 |          | 0.8 - 2.2       |                 |          | 10 - 34  |      |              |
| <b>3</b>                            | 17 (39) | 101             | 121             |          | 1.0             | 1.3             |          | 21       | 33   |              |
|                                     |         | 63              | -               |          | 0               | -               |          | 7.0      | -    |              |
|                                     |         | 86 - 156        |                 |          | 0.7 - 1.9       |                 |          | 16 - 49  |      |              |
| <b>Estrogen receptor status</b>     |         |                 |                 | 0.242    |                 |                 | 0.852    |          |      | <b>0.021</b> |
| <b>neg.</b>                         | 14 (29) | 108             | 127             |          | 1.3             | 1.4             |          | 24       | 45   |              |
|                                     |         | 43              | -               |          | 0               | -               |          | 9.7      | -    |              |
|                                     |         | 72 - 181        |                 |          | 0.5 - 2.2       |                 |          | 20 - 69  |      |              |
| <b>pos.</b>                         | 35 (71) | 100             | 111             |          | 1.1             | 1.5             |          | 13       | 19   |              |
|                                     |         | 29              | 240             |          | 0               | 5.3             |          | 1.2      | 112  |              |
|                                     |         | 90 - 133        |                 |          | 0.9 - 2.0       |                 |          | 11 - 28  |      |              |
| <b>Progesterone receptor status</b> |         |                 |                 | 0.488    |                 |                 | 0.851    |          |      | <b>0.013</b> |
| <b>neg.</b>                         | 22 (44) | 97              | 113             |          | 1.2             | 1.3             |          | 23       | 39   |              |
|                                     |         | 35              | 304             |          | 0               | -               |          | 6.2      | 103  |              |
|                                     |         | 75 - 151        |                 |          | 0.7 - 2.0       |                 |          | 20 - 57  |      |              |
| <b>pos.</b>                         | 28 (56) | 112             | 118             |          | 1.1             | 1.5             |          | 13       | 18   |              |
|                                     |         | 28              | 243             |          | 0               | 5.6             |          | 1.0      | 124  |              |
|                                     |         | 93 - 144        |                 |          | 0.9 - 2.1       |                 |          | 8.5 - 27 |      |              |
| <b>HER2 status</b>                  |         |                 |                 | 0.668    |                 |                 | 0.608    |          |      | 0.492        |
| <b>neg.</b>                         | 36 (80) | 113             | 121             |          | 1.0             | 1.5             |          | 16       | 27   |              |
|                                     |         | 50              | 257             |          | 0               | 5.1             |          | 1.2      | 112  |              |
|                                     |         | 97 - 144        |                 |          | 1.0 - 2.0       |                 |          | 16 - 38  |      |              |
| <b>pos.</b>                         | 9 (20)  | 100             | 87              |          | 1.3             | 1.1             |          | 23       | 28   |              |
|                                     |         | 45              | -               |          | 0.8             | -               |          | 5.6      | -    |              |
|                                     |         | 66 - 108        |                 |          | 0.7 - 1.5       |                 |          | 0 - 69   |      |              |
| <b>Subtyp</b>                       |         |                 |                 | 0.424    |                 |                 | 0.941    |          |      | 0.074        |
| <b>Luminal</b>                      | 29 (66) | 100             | 111             |          | 1.1             | 1.5             |          | 13       | 19.3 |              |
|                                     |         | 29              | 240             |          | 0               | 5.3             |          | 1.2      | 112  |              |
|                                     |         | 90 - 133        |                 |          | 0.9 - 2.0       |                 |          | 11 - 28  |      |              |

(Continued)

| Parameters                   | n (%)    | miR-101         |      |               | miR-372         |      |              | miR-373         |      |          |
|------------------------------|----------|-----------------|------|---------------|-----------------|------|--------------|-----------------|------|----------|
|                              |          | relative values |      | p values      | relative values |      | p values     | relative values |      | p values |
|                              |          | Median          | Mean |               | Median          | Mean |              | Median          | Mean |          |
| <b>HER2 pos.</b>             | 3 (7)    | 120             | -    |               | 1.3             | -    |              | 23              | -    |          |
|                              |          | 79              | -    |               | 1.3             | -    |              | 10              | -    |          |
|                              |          | -               |      | -             |                 | -    |              |                 |      |          |
| <b>Triple neg.</b>           | 12 (27)  | 108             | 132  |               | 1.0             | 1.4  |              | 23              | 43   |          |
|                              |          | 43              | -    |               | 0               | -    |              | 10              | -    |          |
|                              |          | 71 - 194        |      |               | 0.3 - 2.4       |      |              | 15 - 70         |      |          |
| <b>Overall survival</b>      |          |                 |      | *             |                 |      | *            |                 |      | *        |
| <b>alive</b>                 | 45 (94)  | 100             | 116  |               | 1.2             | 1.5  |              | 17              | 28   |          |
|                              |          | 36              | 282  |               | 0               | 4.9  |              | 1.4             | 104  |          |
|                              |          | 95 - 137        |      |               | 1.0 - 1.9       |      |              | 18 - 38         |      |          |
| <b>dead</b>                  | 3 (6)    | 118             | -    |               | 0.9             | -    |              | 16              | -    |          |
|                              |          | 63              | -    |               | 0               | -    |              | 13              | -    |          |
|                              |          |                 | -    |               |                 | -    |              |                 | -    |          |
| <b>Disease free survival</b> |          |                 |      | *             |                 |      | *            |                 |      | *        |
| <b>Recurrence free</b>       | 45 (96)  | 101             | 117  |               | 1.1             | 1.5  |              | 16              | 27   |          |
|                              |          | 36              | 282  |               | 0               | 4.2  |              | 1.4             | 96   |          |
|                              |          | 95 - 139        |      |               | 1 - 1.9         |      |              | 16 - 37         |      |          |
| <b>Recurrence</b>            | 2 (4)    | 99              | 99   |               | 0.6             | 0.6  |              | 37              | 37   |          |
|                              |          | 79              | -    |               | 0               | -    |              | 13              | -    |          |
|                              |          | 0 - 347         |      |               | 0 - 8.8         |      |              | 0 - 342         |      |          |
| <b>Healthy</b>               | 12 (100) | 55              | 56   | <b>0.0001</b> | 0.4             | 0.6  | <b>0.021</b> | 12              | 11   | 0.082    |
|                              |          | 27              | -    |               | 0               | -    |              | 1.0             | -    |          |
|                              |          | 43 - 68         |      |               | 0 - 1.1         |      |              | 6.6 - 15        |      |          |

\*no statistical evaluation possible

significant p values in bold
